# Supplementary material
Source: Springer Nature journal article supplement (https://www.springermedizin.de/resource/supplementary/13633_2012_55_MOESM2_ESM.pdf/9595588)

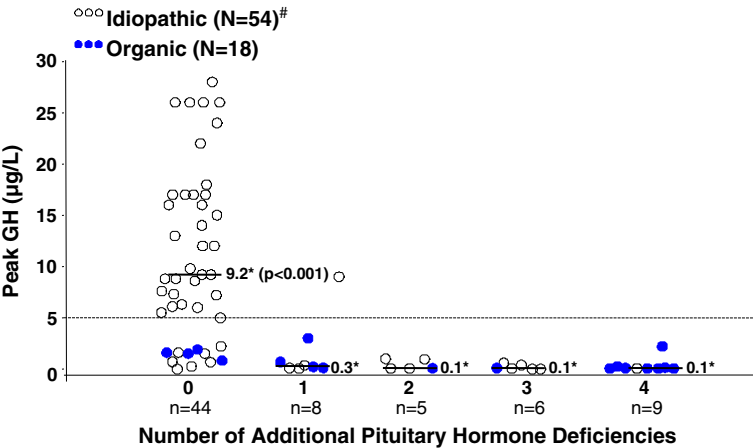

Supplement: MOESM2 [file 9595588]
